# Supplementary material for: An encapsulation strategy to design an In-TS-1 zeolite enabling high activity and stability toward the efficient production of methyl lactate from fructose
Source: Royal Society of Chemistry journal article supplement (doi:10.1039/d3gc05195a), 2024-01-01
Supplement: d3gc05195a1.pdf [file d3gc05195a1.pdf]

# Supporting Information

## **An encapsulation strategy to design In-TS-1 zeolite enabling high activity and stability toward efficient production of methyl lactate from fructose**

**Yuxi Jiang,<sup>a</sup> Xilei Lyu,<sup>\*b,c</sup> Chao Chen,<sup>a</sup> Aotian Ren,<sup>a</sup> Wenqi Qin,<sup>a</sup> Hao Chen<sup>\*d</sup>  
and Xiuyang Lu<sup>\*a</sup>**

<sup>a</sup> Key Laboratory of Biomass Chemical Engineering of Ministry of Education, College of Chemical and Biological Engineering, Zhejiang University, Hangzhou 310058, China.

<sup>b</sup> Institute of Chemical Engineering, Zhejiang Hengyi Petrochemical Research Institute Co., Ltd., Hangzhou 311209, China.

<sup>c</sup> Hangzhou Lanshun Technology Co., Ltd., Hangzhou 311215, China

<sup>d</sup> College of Chemistry and Chemical Engineering, Hunan University, Changsha 410082, China.

E-mail: luxiuyang@zju.edu.cn; 11428044@zju.edu.cn; chenhaoch@hnu.edu.cn

## Experimental section

### Materials

Methyl lactate (98%), methanol (AR), isopropanol (IPA, AR), and tetrapropylammonium hydroxide (TPAOH, 25wt% aqueous solution) were supplied by Sinopharm Chemical Reagent Co., Ltd (China). Fructose (99%), titanium butoxide (TBOT, 99%), indium chloride ( $\text{InCl}_3$ , 99.9%), and tin(IV) chloride pentahydrate ( $\text{SnCl}_4 \cdot 5\text{H}_2\text{O}$ , 99%) were purchased from Shanghai Macklin Biochemical Co., Ltd (China). Tetraethyl orthosilicate (TEOS, 99%), cobalt chloride hexahydrate ( $\text{CoCl}_2 \cdot 6\text{H}_2\text{O}$ , 99.99%), iron chloride ( $\text{FeCl}_3$ , 99.9%), and Indium oxide ( $\text{In}_2\text{O}_3$ ) were provided by Aladdin Chemical Reagent Co., Ltd (China). Nickel(II) chloride Anhydrous ( $\text{NiCl}_2$ , 98%) was purchased from Tokyo Chemical Industry Co., Ltd (Japan). Glycolaldehyde dimethyl acetal (GADMA, 98%) was obtained from Alfa Aesar (China). Methoxyacetaldehyde dimethyl acetal (MADDA, 98%) was bought from J & K Scientific (China).

### Catalyst preparation

In-TS-1 zeolite was synthesized via hydrothermal method. In a typical run, a certain amount of  $\text{InCl}_3$  was dissolved in 14.8 mL of deionized water and stirred for 10 min. Then, 15.63 g TEOS and 6.72 g TPAOH were introduced into the above solution and stirred for 5 h, the mixture was recorded as solution A. Next, 0.6381 g TBOT, 6.1 g IPA, 5.48 g TPAOH, and 12.2 mL deionized water were sequentially added into a new flask and hydrolyzed for 2 h, which was denoted as solution B. Afterwards, solution B was added dropwise into solution A under stirring. After thorough stirring for 2 h, the resulting gel with the molar composition of 1 TEOS:0.025 TBOT:(0.0025-0.03)  $\text{InCl}_3$ :0.2 TPAOH:20  $\text{H}_2\text{O}$  was obtained. The final gel was transferred into a 100 mL Teflon-lined stainless steel autoclave and crystallized at 170 °C for 3 days. The solid sample was thoroughly washed with deionized water, dried at 70 °C, and calcined at 550 °C for 6 h. The as-synthesized zeolites were designated as In-TS-1-x where x represented the molar ratio of

$n(\text{InCl}_3):n(\text{TEOS})$  or  $n(\text{In}):n(\text{Si})$ . Replacing  $\text{InCl}_3$  with  $\text{CoCl}_2 \cdot 6\text{H}_2\text{O}$ ,  $\text{FeCl}_3$ ,  $\text{NiCl}_2$  and  $\text{SnCl}_4 \cdot 5\text{H}_2\text{O}$  to obtain Co-TS-1, Fe-TS-1, Ni-TS-1, Sn-TS-1, respectively, and the ratio of  $n(\text{metal}):n(\text{Si})$  was 0.01. TS-1 zeolite was synthesized as above, except that no metal chloride salt was added.

### Product analysis

Quantification of fructose by high performance liquid chromatography (HPLC, Agilent 1100) with an Aminex HPX-87H column (300 mm $\times$ 7.8 mm) and refractive index detector (RID) with 5 mmol/L  $\text{H}_2\text{SO}_4$  as mobile phase (0.4 mL/min) and the column temperature was 60 °C. Quantitative analysis of MLA, GADMA and MADDA by gas chromatography (GC, Agilent 7890A) equipped with a HP-5 column (30 m $\times$ 0.32 mm $\times$ 0.25  $\mu\text{m}$ ) and a flame ionization detector (FID). The conversion of fructose and yield of products were calculated by the following equations:

$$\text{Fructose conversion (\%)} = 1 - \frac{\text{Moles of fructose remaining in the reaction solution}}{\text{Moles of initial fructose}} \times 100\%$$

$$\text{MLA yield (\%)} = \frac{\text{Moles of MLA}}{(\text{Moles of initial fructose}) \times 2} \times 100\%$$

$$\text{GADMA (or MADDA) yield (\%)} = \frac{\text{Moles of GADMA (or MADDA)}}{(\text{Moles of initial fructose}) \times 3} \times 100\%$$

The experimental result was the average of the three parallel experiments, and the error was the standard deviation of the results of the three samples.

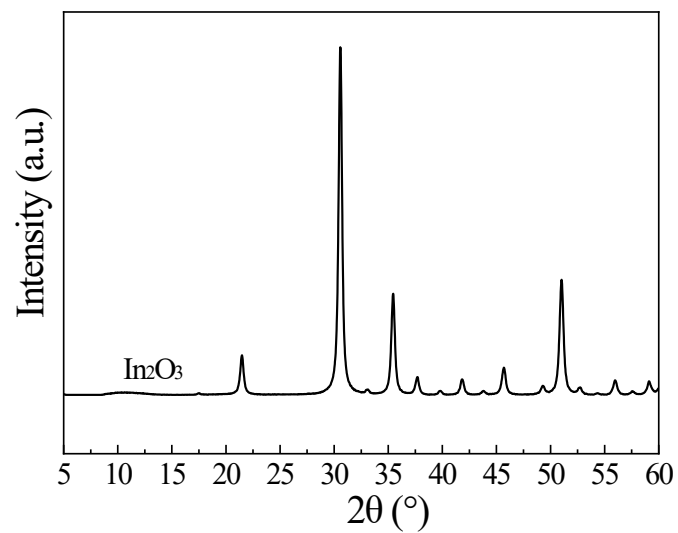

**Fig. S1.** XRD patterns of In<sub>2</sub>O<sub>3</sub>.

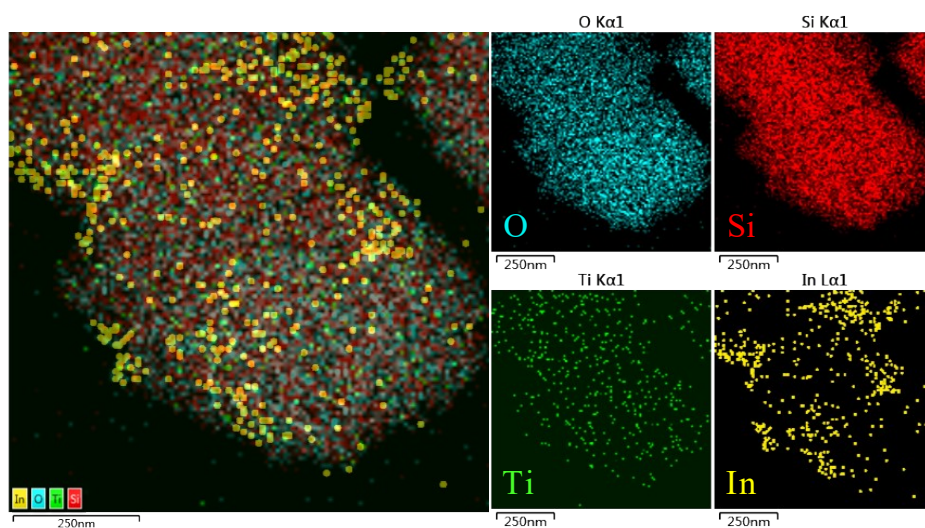

**Fig. S2.** Element mapping analysis of In-TS-1-0.03.

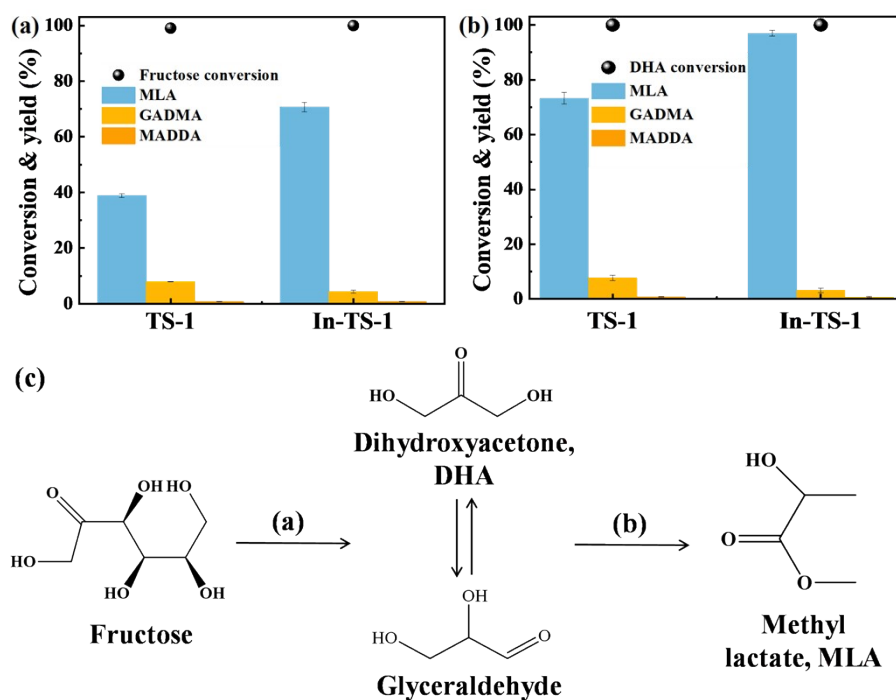

**Fig. S3.** Conversion of (a) fructose and (b) DHA to MLA over TS-1 and In-TS-1. Reaction conditions: 60 mg of fructose, 30 mg of catalyst, 6 mL of methanol, 180 °C, 15 h. (c) Reaction pathway of fructose to MLA.

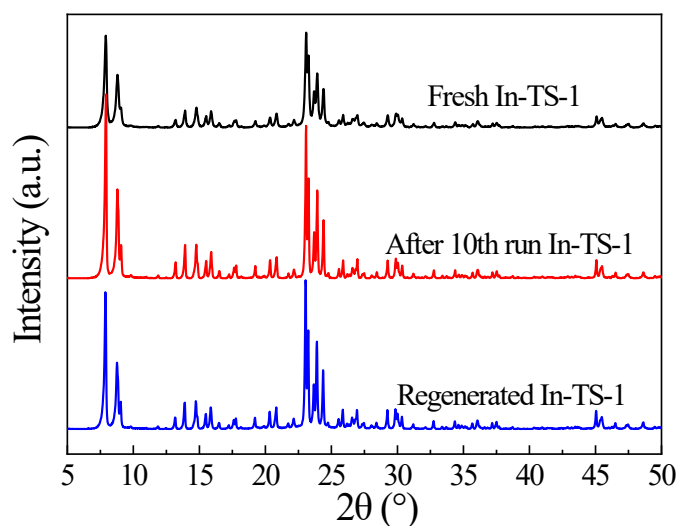

**Fig. S4.** XRD patterns of fresh, reused, and regenerated In-TS-1-0.02 zeolites.

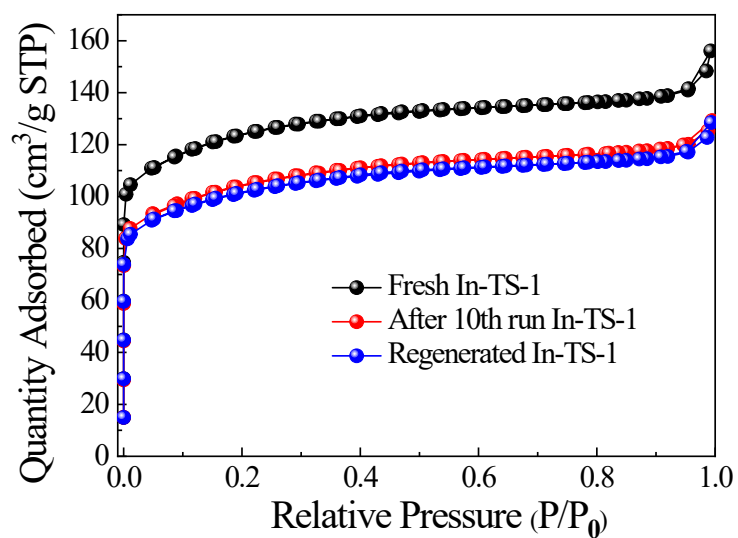

**Fig. S5.** N<sub>2</sub> adsorption–desorption isotherm of fresh, reused, and regenerated In-TS-1-0.02 zeolites.

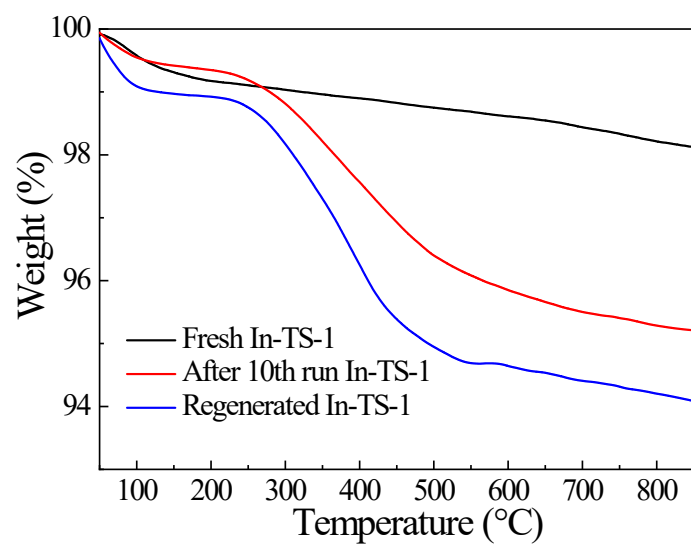

**Fig. S6.** TGA curves of fresh, reused, and regenerated In-TS-1-0.02 zeolites.

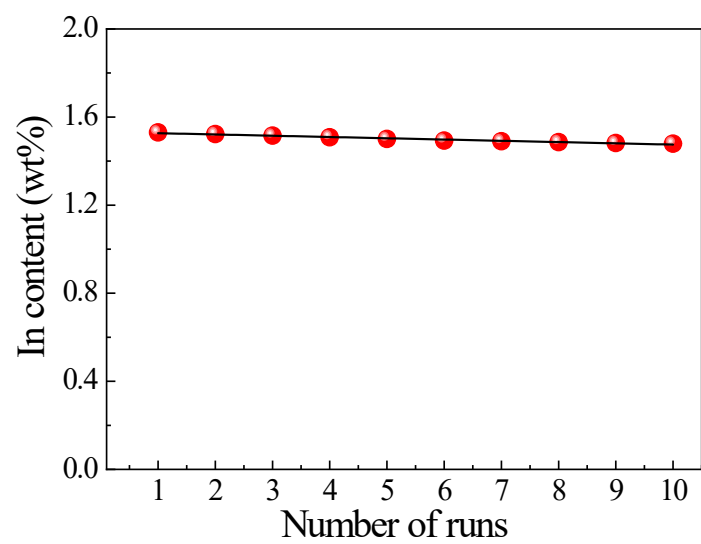

**Fig. S7.** ICP-OES data for the In content of In-TS-1-0.02 per cycle.

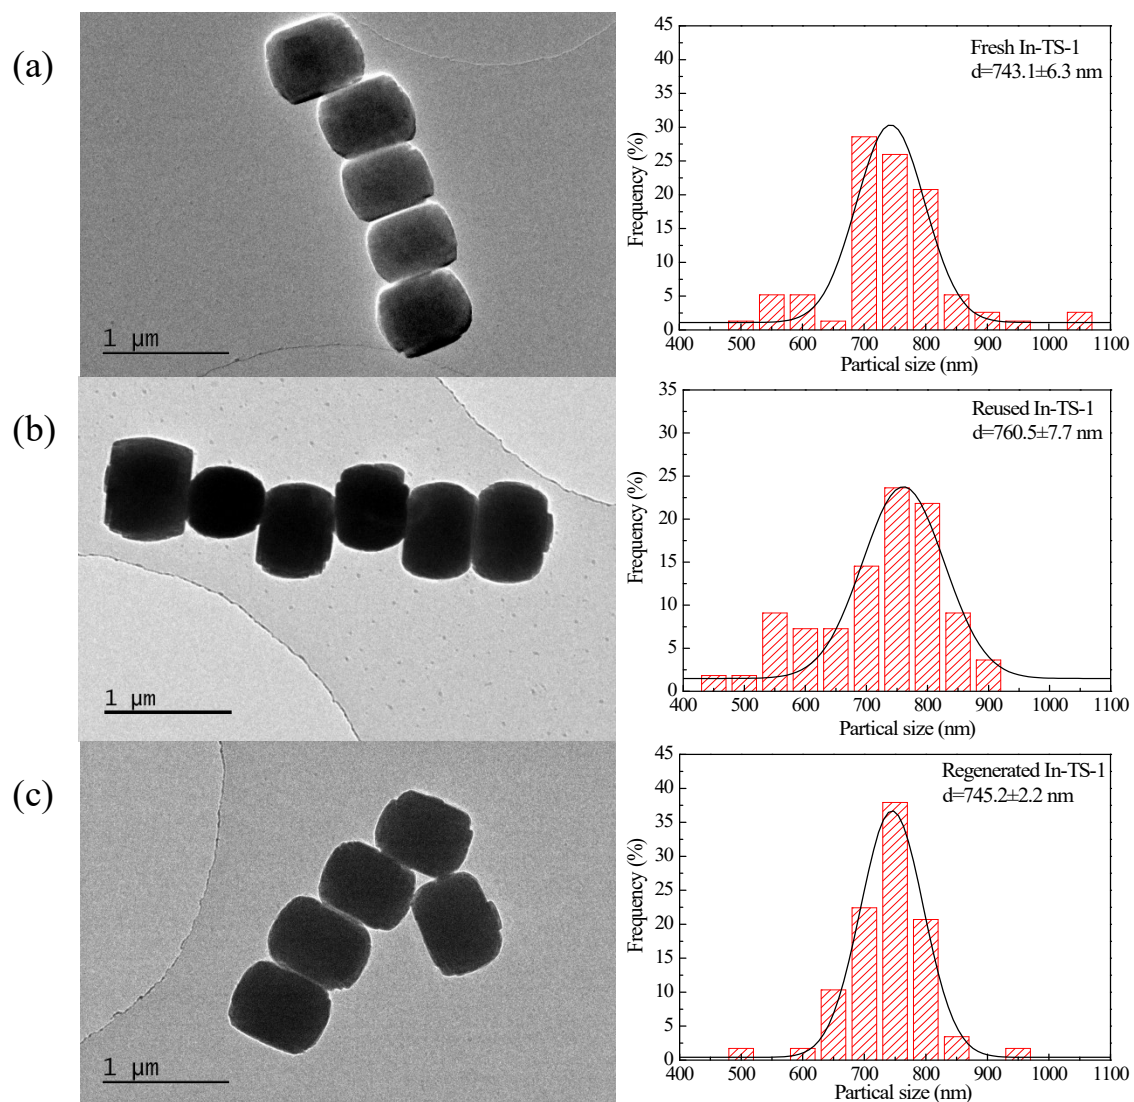

**Fig. S8.** Particle size distribution histograms of (a) fresh, (b) reused, and (c) regenerated In-TS-1-0.02 zeolites. The average mean particle sizes were estimated by counting the diameter of more than 50 random particles from multiple TEM images.



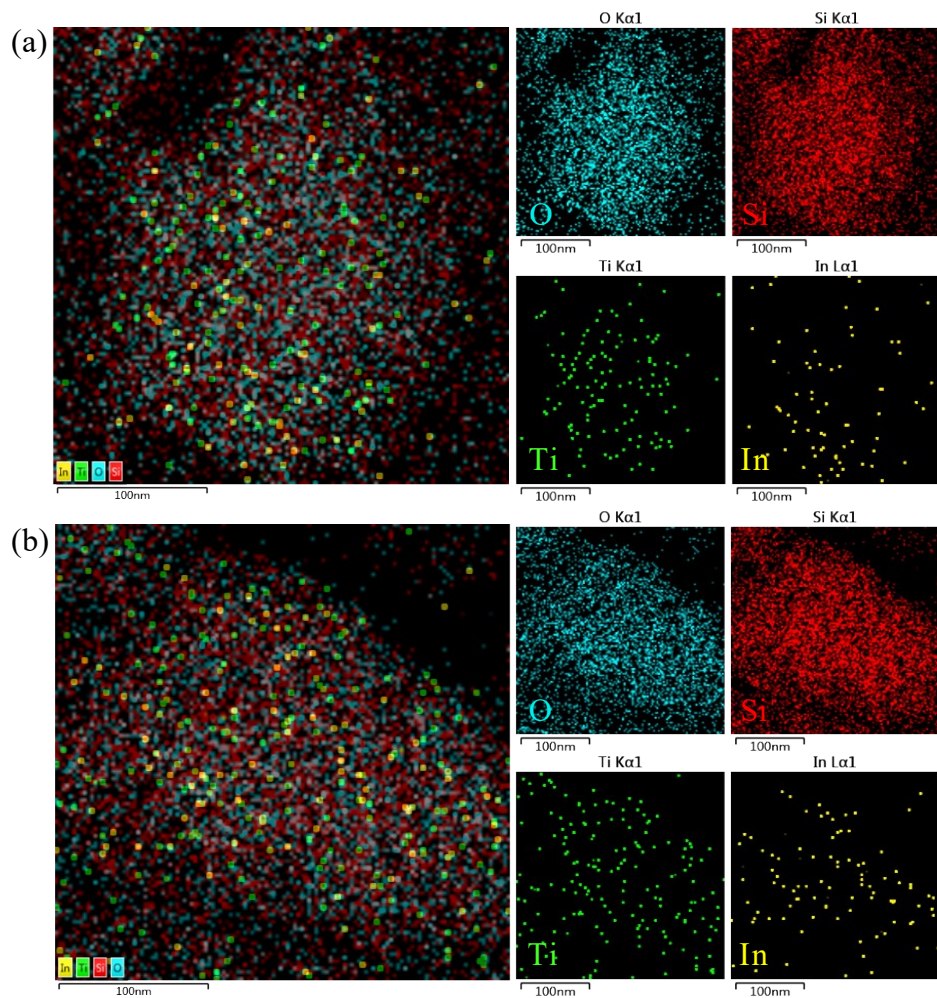

**Fig. S9.** Element mapping analysis of used In-TS-1-0.02 (a) before and (b) after regeneration. Before the measurements, samples were cut into thin slices and dropped onto a Mo grid coated with a carbon membrane.

**Table S1** Relative crystallinity of In-TS-1 zeolites with different In/Si molar ratios.

| In/Si molar ratio | Relative crystallinity (%) <sup>a</sup> |
|-------------------|-----------------------------------------|
| TS-1              | 100                                     |
| 0.0025            | 93.4                                    |
| 0.005             | 87.4                                    |
| 0.01              | 86.3                                    |
| 0.015             | 85.0                                    |
| 0.02              | 86.3                                    |
| 0.025             | 82.0                                    |
| 0.03              | 46.9                                    |

<sup>a</sup> The relative crystallinity of In-TS-1 is determined relative to TS-1 zeolite

**Table S2** Acidic properties calculated from pyridine-FTIR

| Catalysts | Acid amounts ( $\mu\text{mol}\cdot\text{g}^{-1}$ ) |            |            |
|-----------|----------------------------------------------------|------------|------------|
|           | Brønsted acid                                      | Lewis acid | Total acid |
| TS-1      | 20.8                                               | 400.9      | 421.7      |
| Co-TS-1   | 22.9                                               | 408.8      | 431.7      |
| Fe-TS-1   | 136.4                                              | 218.0      | 354.4      |
| In-TS-1   | 28.4                                               | 424.9      | 453.3      |
| Sn-TS-1   | 45.5                                               | 442.6      | 488.1      |
| Ni-TS-1   | 17.2                                               | 371.3      | 388.5      |

**Table S3** Leaching of active sites determined by ICP-OES.

| Catalysts    | Element | Leaching (wt.%) |      |      |      |      |      |      | Total |
|--------------|---------|-----------------|------|------|------|------|------|------|-------|
|              |         | 1               | 2    | 3    | 4    | 5    | 6    | 7    |       |
| Sn-TS-1-0.01 | Sn      | 0.61            | 1.57 | 1.49 | 1.75 | 1.44 | 0.99 | 0.81 | 8.66  |
| In-TS-1-0.01 | In      | 0.38            | 0.29 | 0.3  | 0.27 | 0.46 | 0.55 | 0.58 | 2.83  |

**Table S4** Content of indium in In-TS-1 catalysts.

| In/Si molar ratio <sup>a</sup> | Actual In content (wt%) <sup>b</sup> |
|--------------------------------|--------------------------------------|
| 0.01                           | 1.02                                 |
| 0.02                           | 1.53                                 |
| 0.03                           | 2.03                                 |

<sup>a</sup> Molar ratio of In/Si in the catalyst preparation process.

<sup>b</sup> Determined by ICP-OES.

**Table S5** Comparison of pseudo-yield of retro-aldol reaction.

| Catalysts    | MLA yield (%) |          | Pseudo-yield of retro-aldol reaction (%) <sup>a</sup> |
|--------------|---------------|----------|-------------------------------------------------------|
|              | from fructose | from DHA |                                                       |
| TS-1         | 38.8          | 73.3     | 52.9                                                  |
| In-TS-1-0.02 | 70.7          | 97.0     | 72.9                                                  |

<sup>a</sup> *pseudo-yield of retro-aldol reaction = (MLA yield from fructose)/(MLA yield from DHA)*

**Table S6** Reaction rate constants (k) of fructose transformation at different temperatures.

| T/K | k/h <sup>-1</sup> | R <sup>2</sup> |
|-----|-------------------|----------------|
| 433 | 0.2952            | 0.9639         |
| 443 | 0.352             | 0.9774         |
| 453 | 0.5238            | 0.9916         |
| 463 | 0.8324            | 0.9926         |
| 473 | 1.2937            | 0.9967         |

**Table S7** Comparison of activity and stability of different catalysts

| Catalysts     | Substrate | MLA yield<br>(Reaction<br>conditions) | Number<br>of<br>cycles <sup>a</sup> | MLA yield<br>loss       | Regeneration<br>process                                                   | Ref.                 |
|---------------|-----------|---------------------------------------|-------------------------------------|-------------------------|---------------------------------------------------------------------------|----------------------|
| Sn-Beta       | Sucrose   | 68%<br>(160°C, 20 h)                  | 6                                   | Without<br>deactivation | Calcination at 480<br>°C before the next<br>run                           | 1                    |
| Sr-Sn-Al-Beta | Glucose   | 53%<br>(180 °C, 24 h)                 | 3                                   | 37%                     | Calcination at 400<br>°C before next run,<br>but unable to<br>regenerate  | 2                    |
| Sn-In-MCM-41  | Glucose   | 69.4%<br>(160°C, 20 h)                | 4                                   | 13%                     | Without calcination                                                       | 3                    |
| Sn-Ni-Beta-WQ | Starch    | --                                    | 8                                   | about 11%               | Calcination at 550<br>°C after 4 <sup>th</sup> run to<br>recover activity | 4                    |
| Sn-Ni-Beta-DF |           | --                                    | 8                                   | about 11%               |                                                                           |                      |
| Fe-Sn/Beta    | Glucose   | 67%<br>(220 °C, 6 h)                  | 5                                   | 6.1%                    | Calcination at 550<br>°C before the next<br>run                           | 5                    |
| Sn-SCM-1      | Glucose   | 55.3%<br>(170 °C, 20 h)               | 4                                   | about 10%               | Calcination in air<br>after 3 <sup>rd</sup> run to<br>recover activity    | 6                    |
| Sn-MCM-22     |           | 46.2%<br>(170 °C, 20 h)               |                                     | about 24%               |                                                                           |                      |
| Sn-Al-USY     | Glucose   | 43.2%<br>(170 °C, 6 h)                | 4                                   | about 20%               | Calcination at 550<br>°C after 3 <sup>rd</sup> run to<br>recover activity | 7                    |
| In-TS-1-0.01  | Fructose  | 65.9%<br>(180 °C, 15 h)               | 7                                   | 4.4%                    | Without calcination                                                       | <b>this<br/>work</b> |
| Sn-TS-1-0.01  |           | 56.7%<br>(180 °C, 15 h)               |                                     | 10%                     |                                                                           |                      |
| In-TS-1-0.02  |           | 43.4%<br>(170 °C, 3 h)                |                                     | 14                      |                                                                           |                      |

<sup>a</sup>Conversion of sugar was approximately 100% except In-TS-1-0.02 (71.2% conversion)

**Table S8** Textural properties of In-TS-1-0.02 zeolites.

| Catalysts                          | S <sub>BET</sub> <sup>a</sup><br>(m <sup>2</sup> /g) | S <sub>Micro</sub> <sup>b</sup><br>(m <sup>2</sup> /g) | V <sub>Total</sub> <sup>c</sup><br>(cm <sup>3</sup> /g) | V <sub>Micro</sub> <sup>a</sup><br>(cm <sup>3</sup> /g) |
|------------------------------------|------------------------------------------------------|--------------------------------------------------------|---------------------------------------------------------|---------------------------------------------------------|
| Fresh In-TS-1                      | 459.2                                                | 277.1                                                  | 0.24                                                    | 0.11                                                    |
| After 10 <sup>th</sup> run In-TS-1 | 383.4                                                | 228.0                                                  | 0.20                                                    | 0.09                                                    |
| Regenerated In-TS-1                | 373.2                                                | 233.7                                                  | 0.20                                                    | 0.10                                                    |

<sup>a</sup> Acquired by the Brunauer-Emmett-Teller (BET) equation.

<sup>b</sup> Obtained by t-plot method.

<sup>c</sup> Calculated at P/P<sub>0</sub> of approximately 0.99.

## References

1. M. S. Holm, S. Saravanamurugan and E. Taarning, *Science*, 2010, **328**, 602-605.
2. A. Aho, N. Kumar, K. Eränen, R. Lassfolk, P. Mäki-Arvela, T. Salmi, M. Peurla, I. Angervo, J. Hietala and D. Y. Murzin, *Microporous Mesoporous Mater.*, 2023, **351**, 112483.
3. Ó. de la Iglesia, M. Sarango, M. Munárriz, M. Malankowska, A. Navajas, L. M. Gandía, J. Coronas and C. Téllez, *ACS Sustainable Chem. Eng.*, 2022, **10**, 2868-2880.
4. P. Sun, W. Ling, H. Wang, J. Huang, Y. Liao and C. Wang, *Mol. Catal.*, 2023, **545**, 113226.
5. Q. Cai, X. Yue and W.-S. Dong, *J. Porous Mater.*, 2021, **28**, 1315-1324.
6. X. Li, X. Yuan, G. Xia, J. Liang, C. Liu, Y. Qin, Z. Wang and W. Yang, *Ind. Eng. Chem. Res.*, 2021, **60**, 8027-8034.
7. J. Iglesias, J. Moreno, G. Morales, J. A. Melero, P. Juárez, M. López-Granados, R. Mariscal and I. Martínez-Salazar, *Green Chem.*, 2019, **21**, 5876-5885.
